# Supplementary material
Source: HighWire-hosted journal article supplement (http://jme.bmj.com/highwire/filestream/144876/field_highwire_adjunct_files/0/further-responses.pdf)
Supplement: further-responses.pdf [file further-responses.pdf]

### **Further responses**

We have received a great many articles in response to this paper, which are currently under review and have dedicated a special issue to the topic.

Due to the volume of material we now have, please note that except for exceptional circumstances we will find it difficult to publish further articles in direct response.

We can still accept eLetters- the submission form is available here:

<http://jme.bmj.com/content/early/2012/03/01/medethics-2011-100411.short>

Using the 'Submit a Response' option under the Responses heading on the 'This Article' menu to the right of the article.
